# Supplementary material for: Nickel cobalt phosphate/phosphide as a promising electrode material for extrinsic supercapacitors: machine learning analysis
Source: Royal Society of Chemistry journal article supplement (doi:10.1039/d4ta07613c), 2025-01-01
Supplement: d4ta07613c1.pdf [file d4ta07613c1.pdf]

## Nickel Cobalt Phosphate/Phosphide as Promising Electrode Materials for Extrinsic Supercapacitors

C. D. Chavare<sup>1,3,4</sup>, D. S. Sawant<sup>1</sup>, S. V. Gaikwad<sup>1</sup>, A. V. Fulari<sup>5</sup>, H. R. Kulkarni<sup>4</sup>, D. P. Dubal<sup>\*2</sup>, G. M. Lohar<sup>\*\*1,2</sup>

<sup>1</sup>Department of Physics, Lal Bahadur Shastri College of Arts, Science and Commerce, Satara, 415002, (M.S.) India.

<sup>2</sup>School of Chemistry and Physics, Queensland University of Technology, 2 George Street, Brisbane, QLD 4000, Australia

<sup>3</sup>Department of Physics, Annasaheb Magar Mahavidyalaya, Hadapsar, Pune, 411028, (M.S.) India.

<sup>4</sup>G. H. Raisoni College of Arts, Commerce and Science, Wagholi, Pune, 412207, (M.S.) India.

<sup>5</sup>Symbiosis Centre for Nanoscience and Nanotechnology, Symbiosis International (Deemed University), Pune, India

Email: [gauravlohar24@gmail.com](mailto:gauravlohar24@gmail.com), [deepak.dubal@qut.edu.au](mailto:deepak.dubal@qut.edu.au)

Figure:

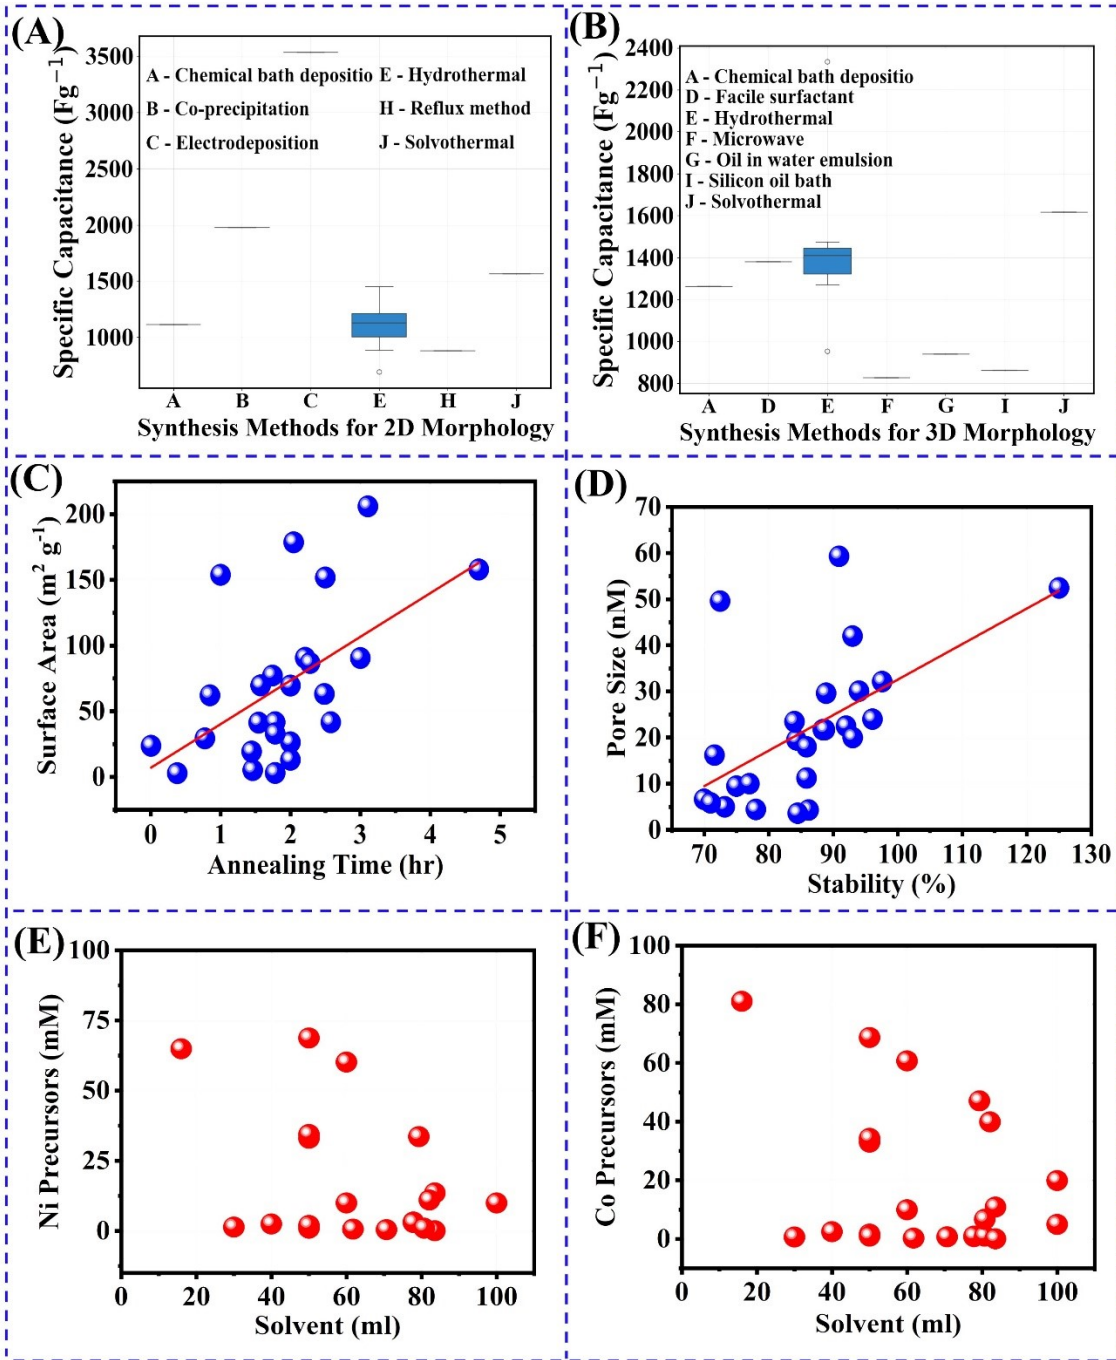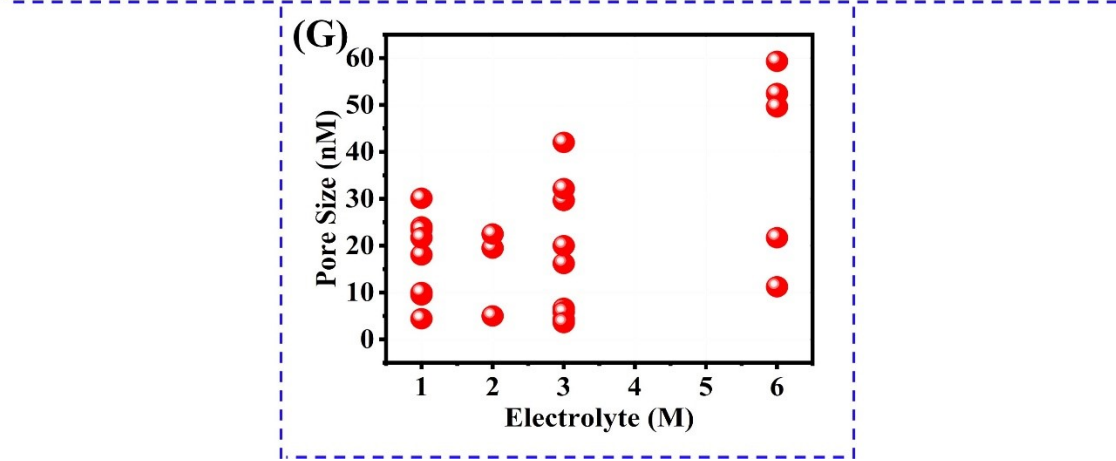

**Fig. S1 Machine learning analysis of Supercapacitor behavior of nickel cobalt phosphate material:** (A) Box plot of specific capacitance versus synthesis method for 2D materials, (B) Box plot of specific capacitance versus synthesis method for 3D materials, Scattered plot of (C) surface area versus annealing time, (D) pore size versus stability, (E) Ni precursors versus solvent, (F) Co precursors versus solvent, (G) Pore size versus electrolyte.

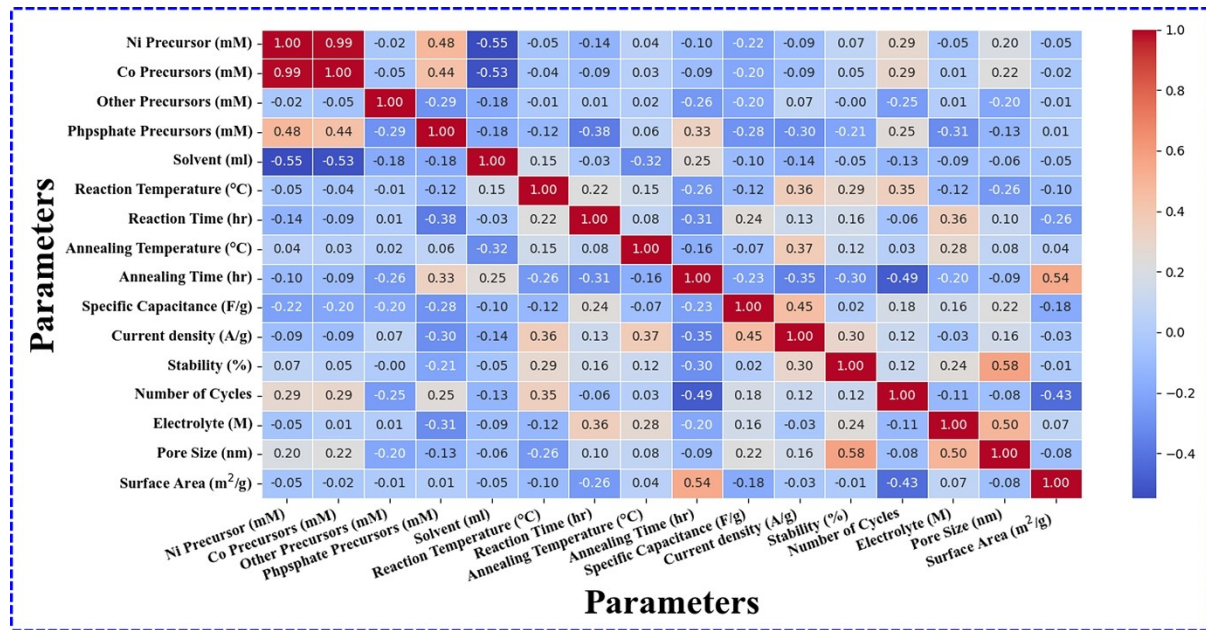

**Fig. S2 Heatmap of correlation coefficients for features.**

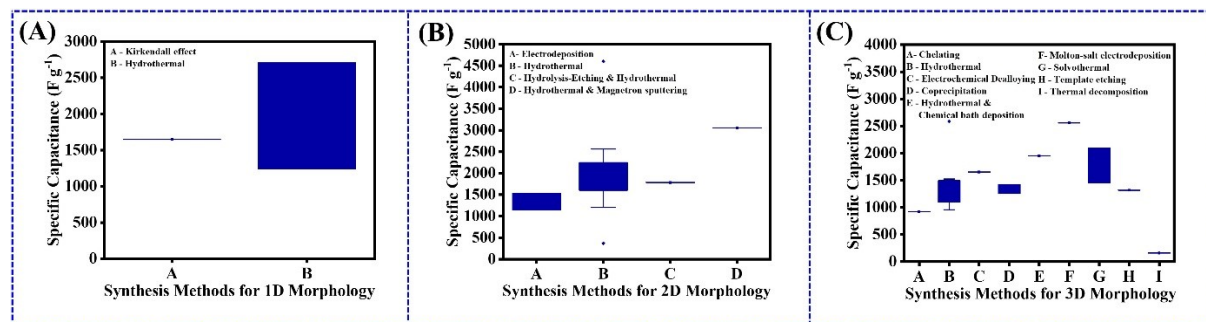

**Fig. S3 Machine learning analysis of Supercapacitor behavior of nickel cobalt phosphide material:** (A) Box plot of specific capacitance versus synthesis method for 1D materials, (B) Box plot of specific capacitance versus synthesis method for 2D materials, (C) Box plot of specific capacitance versus synthesis method for 3D materials.
